# Supplementary material
Source: Springer Nature journal article supplement (https://www.springermedizin.de/resource/supplementary/12889_2012_5922_MOESM5_ESM.pdf/9496586)
Supplement: MOESM5 [file 9496586]

| Hospital | Type of policy                                        | Accessibility and education |                                                              |                           |                                               | Enforcement                                             |                                               |                                                                   | Hospital staff intervention                            |                                                                                |                                                                         |                                                   |                           | Index score |
|----------|-------------------------------------------------------|-----------------------------|--------------------------------------------------------------|---------------------------|-----------------------------------------------|---------------------------------------------------------|-----------------------------------------------|-------------------------------------------------------------------|--------------------------------------------------------|--------------------------------------------------------------------------------|-------------------------------------------------------------------------|---------------------------------------------------|---------------------------|-------------|
|          | Smoking not allowed in hospital for staff or visitors | Ban of tobacco sales        | Ban of tobacco advertisement/company sponsorship in hospital | Visible non-smoking signs | Tobacco control campaign/educational activity | States consequences of noncompliance for hospital staff | Explains duties of tobacco control supervisor | Includes tobacco control work in department and staff evaluations | Award for hospital staff who successfully quit smoking | Doctors required to ask about patients' smoking history and advise on quitting | Hospital employees not permitted to smoke outdoors wearing work clothes | Doctors not allowed to accept cigarettes as gifts | Tobacco control trainings |             |
| 1        |                                                       |                             |                                                              |                           |                                               | X                                                       | X                                             | X                                                                 | X                                                      | X                                                                              | X                                                                       |                                                   | X                         | 7           |
| 2        |                                                       | X                           | X                                                            | X                         | X                                             |                                                         | X                                             | X                                                                 |                                                        | X                                                                              | X                                                                       | X                                                 |                           | 9           |
| 3        |                                                       |                             |                                                              | X                         | X                                             | X                                                       | X                                             | X                                                                 |                                                        | X                                                                              |                                                                         |                                                   |                           | 6           |
| 4        |                                                       | X                           | X                                                            |                           | X                                             | X                                                       | X                                             | X                                                                 |                                                        | X                                                                              | X                                                                       | X                                                 | X                         | 10          |
| 5        | X                                                     | X                           | X                                                            | X                         | X                                             |                                                         | X                                             | X                                                                 | X                                                      | X                                                                              | X                                                                       | X                                                 |                           | 11          |
| 6        | X                                                     | X                           | X                                                            | X                         | X                                             | X                                                       | X                                             | X                                                                 |                                                        | X                                                                              | X                                                                       |                                                   | X                         | 11          |
| 7        |                                                       | X                           | X                                                            | X                         | X                                             | X                                                       |                                               | X                                                                 |                                                        | X                                                                              | X                                                                       | X                                                 |                           | 9           |
